# Supplementary material
Source: Springer Nature journal article supplement (https://www.springermedizin.de/resource/supplementary/12885_2006_568_MOESM6_ESM.pdf/9469796)

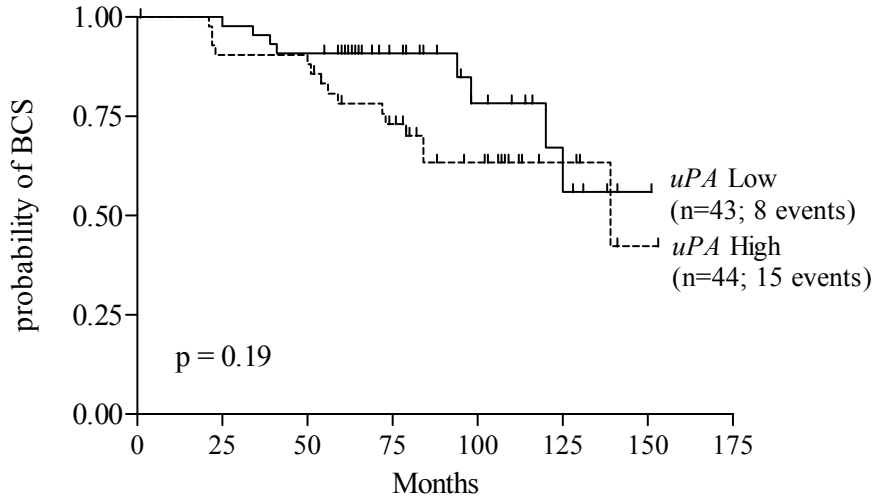

Supplement: MOESM6 [file 9469796]
